# Supplementary material for: Effects of Sublethal Concentrations of Insecticides on the Functional Response of Two Mirid Generalist Predators
Source: PLoS One. 2015 Dec 7;10(12):e0144413. doi: 10.1371/journal.pone.0144413 (PMC4671552; doi:10.1371/journal.pone.0144413)
Supplement: S1 Dataset — (XLSX) [file pone.0144413.s001.xlsx]

## Sheet: sheet 1
S1 Dataset. Raw data for Macrolophus pygmaeus and Nesidiocoris tenuis functional response study
Macrolophus pygmaeus			Macrolophus pygmaeus			Macrolophus pygmaeus			Nesidiocoris tenuis			Nesidiocoris tenuis			Nesidiocoris tenuis
Chlorantraniliprole			Thiacloprid			Control			Chlorantraniliprole			Thiacloprid			Control
Egg density	Consumed		Egg density	Consumed		Egg density	Consumed		Egg density	Consumed		Egg density	Consumed		Egg density	Consumed
4	0		4	1		4	3		4	4		4	0		4	0
4	0		4	2		4	4		4	4		4	0		4	0
4	0		4	2		4	2		4	1		4	4		4	0
4	0		4	0		4	1		4	0		4	0		4	0
4	4		4	0		4	4		4	2		4	0		4	2
4	4		4	0		4	1		4	0		4	1		4	4
4	0		4	0		4	1		4	2		4	0		4	2
4	0		4	0		4	0		4	2		4	3		4	4
4	0		4	0		4	0		4	0		4	0		4	1
4	0		4	2		4	0		4	0		4	4		4	2
8	1		8	0		8	8		8	1		8	2		8	0
8	3		8	0		8	1		8	0		8	0		8	7
8	5		8	4		8	4		8	5		8	2		8	0
8	6		8	0		8	1		8	4		8	2		8	6
8	1		8	2		8	2		8	3		8	0		8	4
8	0		8	1		8	6		8	1		8	2		8	6
8	0		8	1		8	2		8	1		8	0		8	3
8	0		8	3		8	3		8	1		8	0		8	2
8	0		8	0		8	4		8	3		8	0		8	4
8	2		8	0		8	5		8	1		8	0		8	6
16	0		16	0		16	12		16	3		16	0		16	0
16	3		16	7		16	3		16	12		16	0		16	0
16	5		16	13		16	2		16	1		16	0		16	0
16	0		16	0		16	1		16	0		16	4		16	3
16	1		16	2		16	4		16	3		16	3		16	9
16	6		16	4		16	2		16	0		16	3		16	10
16	0		16	1		16	5		16	0		16	1		16	11
16	0		16	1		16	4		16	1		16	0		16	7
16	0		16	0		16	3		16	0		16	2		16	3
16	0		16	0		16	8		16	1		16	0		16	2
32	3		32	0		32	4		32	0		32	0		32	4
32	8		32	7		32	4		32	0		32	1		32	5
32	0		32	2		32	7		32	13		32	0		32	6
32	1		32	1		32	5		32	0		32	0		32	0
32	0		32	10		32	5		32	1		32	0		32	5
32	0		32	1		32	4		32	0		32	0		32	16
32	5		32	3		32	10		32	16		32	1		32	18
32	0		32	2		32	3		32	0		32	2		32	15
32	6		32	0		32	8		32	0		32	3		32	12
32	0		32	2		32	1		32	1		32	2		32	5
64	2		64	6		64	3		64	7		64	12		64	4
64	12		64	0		64	3		64	6		64	11		64	6
64	11		64	5		64	10		64	5		64	0		64	18
64	7		64	7		64	3		64	0		64	10		64	9
64	2		64	5		64	4		64	0		64	0		64	36
64	3		64	5		64	5		64	41		64	3		64	7
64	0		64	4		64	4		64	0		64	0		64	39
64	6		64	2		64	4		64	2		64	0		64	14
64	5		64	1		64	8		64	6		64	20		64	12
64	1		64	6		64	6		64	1		64	0		64	5
128	8		128	1		128	8		128	1		128	11		128	0
128	5		128	0		128	4		128	10		128	0		128	8
128	5		128	1		128	10		128	0		128	0		128	15
128	2		128	4		128	10		128	1		128	0		128	0
128	5		128	3		128	0		128	10		128	0		128	37
128	2		128	2		128	10		128	23		128	0		128	27
128	10		128	0		128	5		128	12		128	10		128	14
128	7		128	3		128	8		128	11		128	8		128	4
128	5		128	3		128	10		128	0		128	4		128	13
128	5		128	3		128	12		128	1		128	7		128	2
